# Supplementary material for: Multiple Estimates of Transmissibility for the 2009 Influenza Pandemic Based on Influenza-like-Illness Data from Small US Military Populations
Source: PLOS journal article supplement (doi:10.1371/journal.pcbi.1003064), 2013-05-16
Supplement: S7 (10.1371/journal.pcbi.1003064.s007) [file journal.pcbi.1003064.s007]

**Table S1** Hypercube parameters and step-size.

| Parameter                        | min  | max | step size |
|----------------------------------|------|-----|-----------|
| $\beta_0$ (weeks <sup>-1</sup> ) | 2    | 6   | 0.4       |
| $\beta_1$ (weeks <sup>-1</sup> ) | 2    | 6   | 0.4       |
| $R_0$                            | 0.74 | 2.2 | 0.15*     |
| $R^*$                            | 0.74 | 2.2 | 0.15*     |
| $t_1$ (weeks)                    | 1    | 15  | 1         |
| $\Delta t$ (weeks)               | 0    | 8   | 1         |
| baseline noise, $\phi_N$         | 1    | 10  | 1         |

\* Although the algorithm steps through  $\beta$ , since  $T_g$  is a constant, this is equivalent to stepping through  $R$ . Hence, we report both here.
