# Supplementary material for: Multiple Estimates of Transmissibility for the 2009 Influenza Pandemic Based on Influenza-like-Illness Data from Small US Military Populations
Source: PLOS journal article supplement (doi:10.1371/journal.pcbi.1003064), 2013-05-16
Supplement: S8 (10.1371/journal.pcbi.1003064.s008) [file journal.pcbi.1003064.s008]

**Table S2** ICD-9 Codes and frequencies for respiratory illnesses in the Defense Medical Surveillance System (DMSS) for the period January 2009 through April 2011.

| ICD-9 Code    | Description                                                         | Number of Cases | ILI Group |
|---------------|---------------------------------------------------------------------|-----------------|-----------|
| 079.99 (7999) | Viral infection NOS                                                 | 158,105         | Large     |
| 3829          | Unspecified otitis media, Otitis media: NOS, acute NOS, chronic NOS | 59,505          | Large     |
| 460           | Acute nasopharyngitis                                               | 165,375         | Large     |
| 461.9 (4619)  | Sinusitis, acute NOS                                                | 60,709          | Large     |
| 465.8 (4658)  | Infectious upper respiratory, multiple sites, acute NEC             | 897             | small     |
| 465.9 (4659)  | Upper respiratory infection, acute. NOS.                            | 491,810         | Large     |
| 466 (4660)    | Bronchitis, acute                                                   | 83,450          | Large     |
| 486 (486)     | Pneumonia, organism unspecified                                     | 85,633          | Large     |
| 487.0 (4870)  | Influenza w/ pneumonia                                              | 404             | Small     |
| 487.1 (4871)  | Influenza w/ other respiratory manifestations                       | 25,293          | Small     |
| 487.8 (4878)  | Influenza with manifestation NEC                                    | 1006            | Small     |
| 490 (490)     | Bronchitis, not specified as acute or chronic                       | 85,526          | Large     |
| 780.6 (7806)  | Fever, nonperinatal                                                 | 56              | Large     |
| 786.2 (7862)  | Cough                                                               | 94,675          | Large     |

1.0
