# Supplementary material for: Multiple Estimates of Transmissibility for the 2009 Influenza Pandemic Based on Influenza-like-Illness Data from Small US Military Populations
Source: PLOS journal article supplement (doi:10.1371/journal.pcbi.1003064), 2013-05-16
Supplement: S11 (10.1371/journal.pcbi.1003064.s011) [file journal.pcbi.1003064.s011]

## Text S1

### Estimation of goodness-of-fit

We assume that the likelihood of a profile of observed incidence at some installation,  $\{k_1, k_2, \dots, k_i, \dots, k_n\}$ , where  $n$  is the total number of weeks over which the pandemic is observed, given a model with a set of parameters is equal to  $\prod P(k_i|\lambda_i)$ , running from 1 through  $n$ . Here,  $P(k, \lambda)$  is the Poisson density:

$$P(k, \lambda) = \frac{\lambda^k e^{-\lambda}}{k!}, \quad (7)$$

where  $k$  is an integer equal to, or greater than zero and  $\lambda$  is a real positive number. The log of this is:  $k \ln(\lambda) - \lambda - \ln(k!)$ . Thus, the log-likelihood function we attempt to maximize for a given set of model parameters is:

$$PLL(\mathbf{k}|\mathbf{M}) = \sum_{i=1}^n k_i \ln(\lambda_i) - \lambda_i - \ln(k_i!) \quad (8)$$

where  $\mathbf{M}$  are the parameters in the model that are fitted, and the sum runs over the time window over which we are fitting. For the four-parameter model, these are: (1) the average period of infection,  $T_g$ ; (2) the basic reproduction number,  $R_0$  (or, equivalently, the transmission rate,  $\beta_0$ ); (3) the time of the initial infection,  $t_i$ ; and (4) the effective number of susceptibles,  $N_{eff}$ . For the eight-parameter model, we add: (5) the value that  $R_0$  is reduced, or increased to,  $R^*$  (or, equivalently,  $\beta_0 \rightarrow \beta_1$ ); (6) the time at which this reduction occurs,  $t_1$ ; (7) the duration over which the basic reproduction number is changed,  $\Delta t$ ; and (8) a baseline noise component,  $\phi_N$ . In the results presented here, we held  $T_g = 2.6$  days, reducing the fit to seven parameters.
